# Supplementary material for: Macroscopic and microscopic defect management in blue/green photodetectors for underwater wireless optical communication
Source: Royal Society of Chemistry journal article supplement (doi:10.1039/d2tc00097k), 2022-01-01
Supplement: d2tc00097k1.pdf [file d2tc00097k1.pdf]

## Supplementary Information for

### Macroscopic and Microscopic Defect Management in Blue/Green Photodetectors for Underwater Wireless Optical Communication

Xiangyu Zhou,<sup>ab</sup> Lingzhi Luo,<sup>b</sup> Yixuan Huang,<sup>b</sup> Shunyong Wei,<sup>b</sup> Jihua Zou,<sup>b</sup> Aoxi He,<sup>c</sup>  
Binbin Huang,<sup>d</sup> Xiao Li,<sup>e</sup> Junting Zhao,<sup>\*f</sup> Kai Shen,<sup>\*b</sup> Dewei Zhao<sup>\*c</sup> and Jiang Wu<sup>b</sup>

<sup>a</sup> College of Chemistry and Chemical Engineering, Henan University of Technology,  
Zhengzhou 450001, China

<sup>b</sup> Institute of Fundamental and Frontier Sciences, University of Electronic Science and  
Technology of China, Chengdu 610054, China

<sup>c</sup> College of Materials Science and Engineering & Institute of New Energy and Low-Carbon  
Technology, Sichuan University, Engineering Research Center of Alternative Energy  
Materials & Devices, Ministry of Education, Chengdu 610065, China

<sup>d</sup> College of Material Science and Engineering, Sichuan University, Chengdu 610065, China

<sup>e</sup> Department of Electronic and Electrical Engineering, University College London Torrington  
Place, London WC1E 7JE, UK

<sup>f</sup> School of Environmental and Engineering, Henan University of Technology, Zhengzhou  
450001, China

Corresponding Authors

\*E-mail: [kaishen@uestc.edu.cn](mailto:kaishen@uestc.edu.cn), [dewei\\_zhao@hotmail.com](mailto:dewei_zhao@hotmail.com) and [dewei.zhao@scu.edu.cn](mailto:dewei.zhao@scu.edu.cn),  
[zjtyjk@126.com](mailto:zjtyjk@126.com)

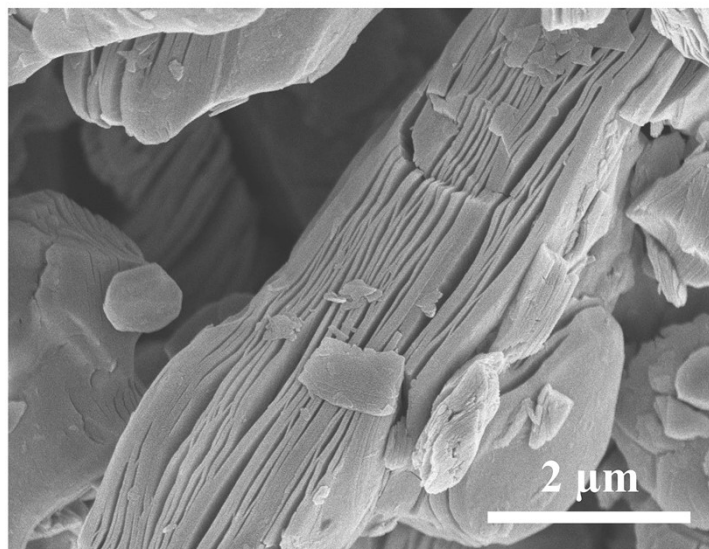

**Figure S1.** SEM image of pristine multi-layered MXene.

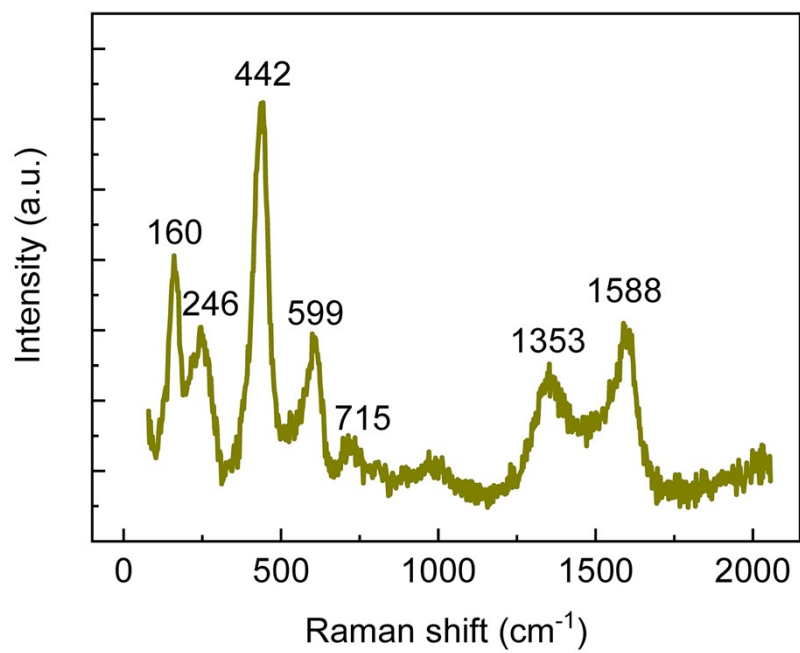

**Figure S2.** Raman spectrum of Br-terminated  $\text{Ti}_3\text{C}_2$  MXene nanoparticles.

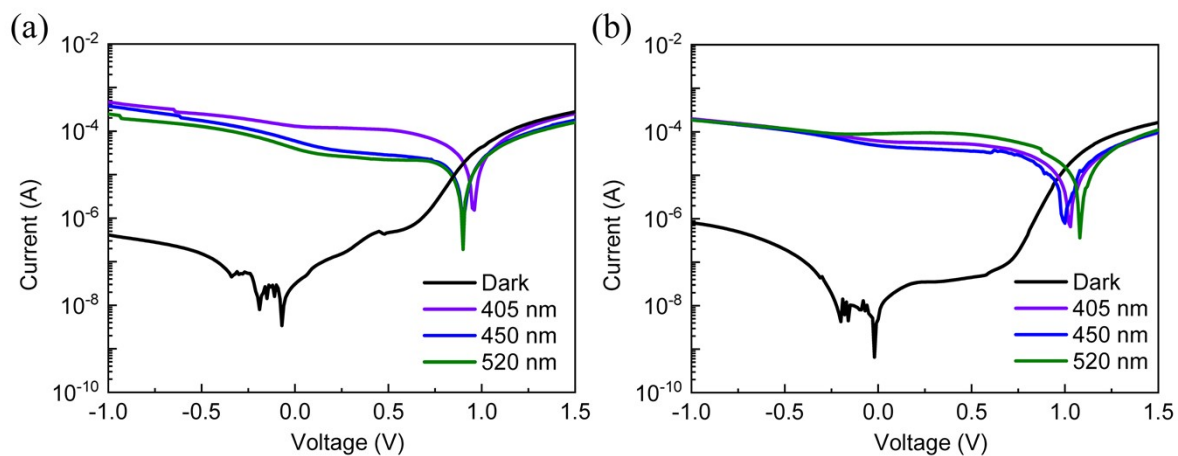

**Figure S3.** Logarithmic  $I$ - $V$  curves of (a) the pristine and (b) 4% MNPs-modified photodetectors measured in the dark and under illumination with different wavelengths (405, 450, and 520 nm).

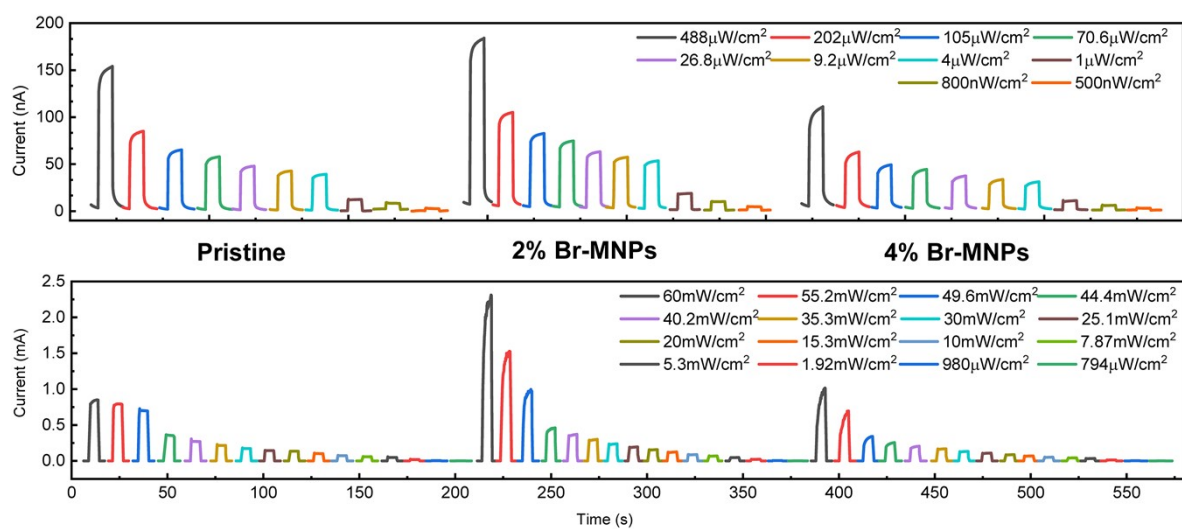

**Figure S4.** Light intensity-dependent photocurrent of the pristine and MNPs-modified photodetectors measured under 520 nm irradiation with no bias voltage.

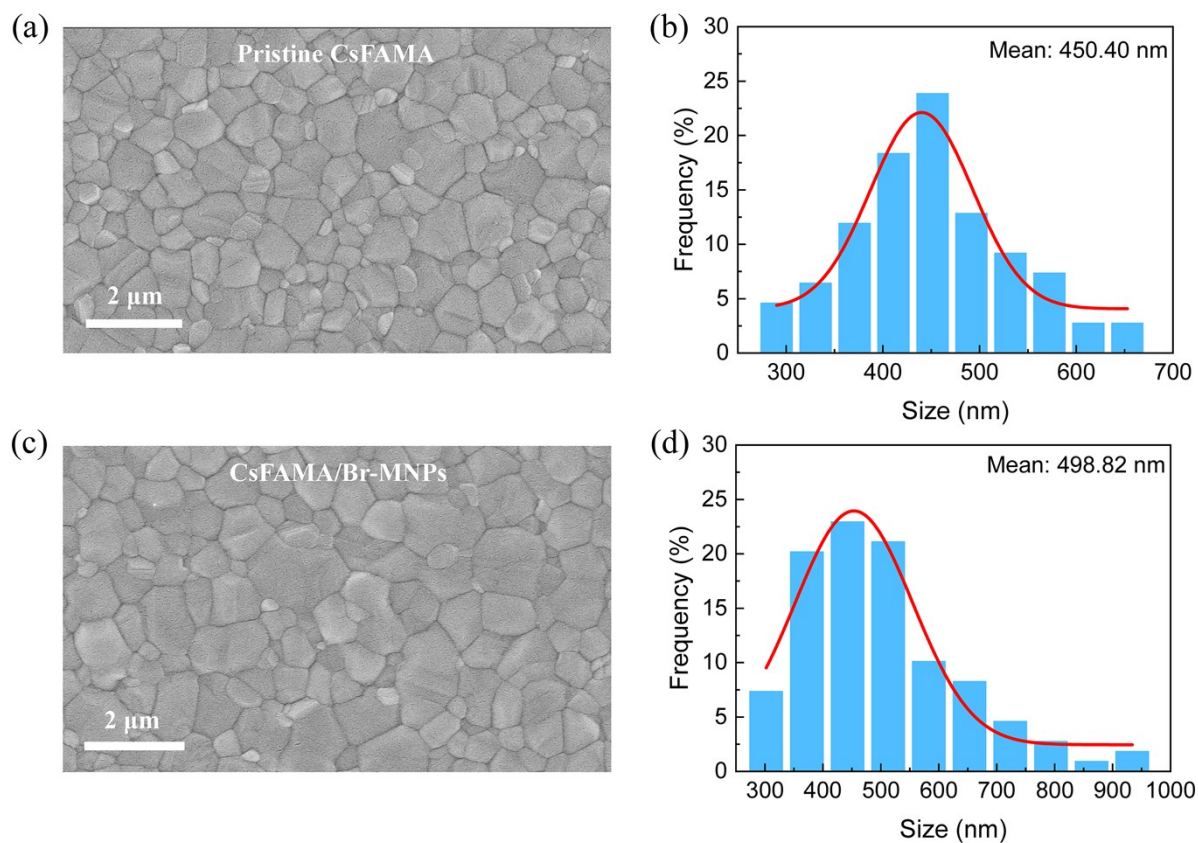

**Figure S5.** (a) SEM images of the pristine CsFAMA film. (b) The corresponding size distribution. (c) SEM images of CsFAMA film with Br-MNPs. (d) The distribution of corresponding grain size.

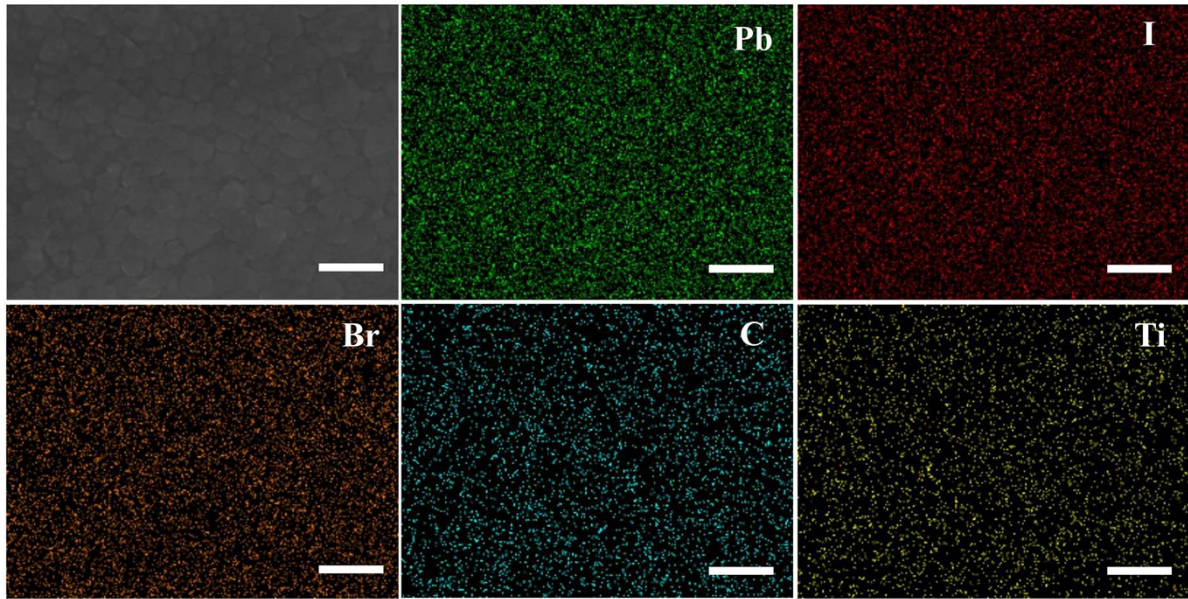

**Figure S6.** SEM image and the corresponding EDS mapping (Pb, I, Br, C, Ti) of Br-MNPs treated perovskite film. The scale bar is 1  $\mu\text{m}$ .

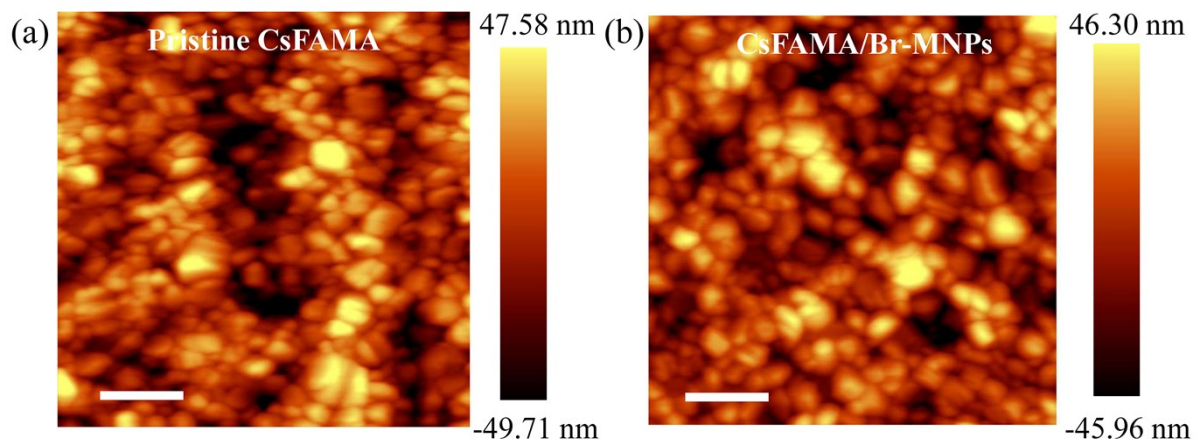

**Figure S7.** AFM images of (a) pristine and (b) Br-MNPs doped CsFAMA films. Scale bar is 1  $\mu\text{m}$ .



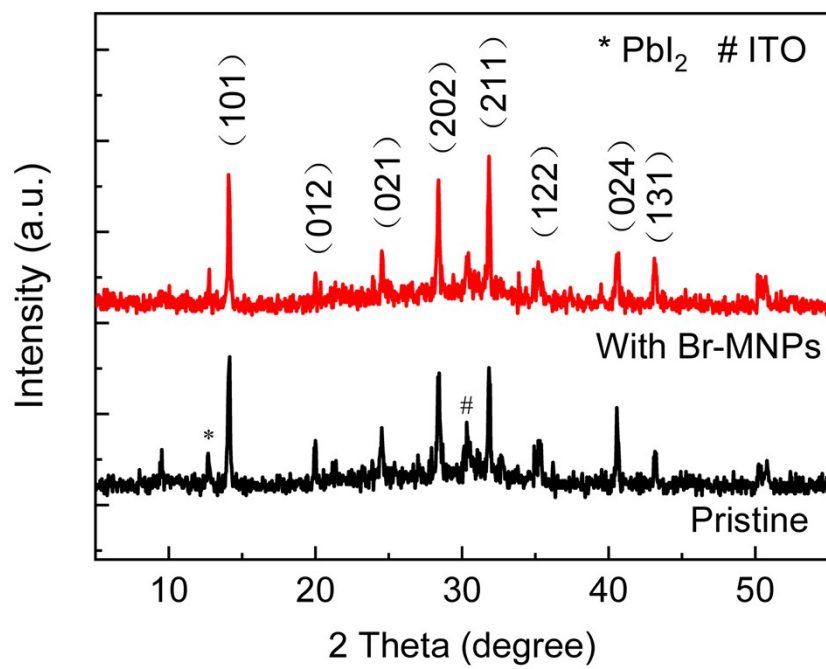

**Figure S8.** XRD patterns of the perovskite films before and after Br-MNPs treatment.

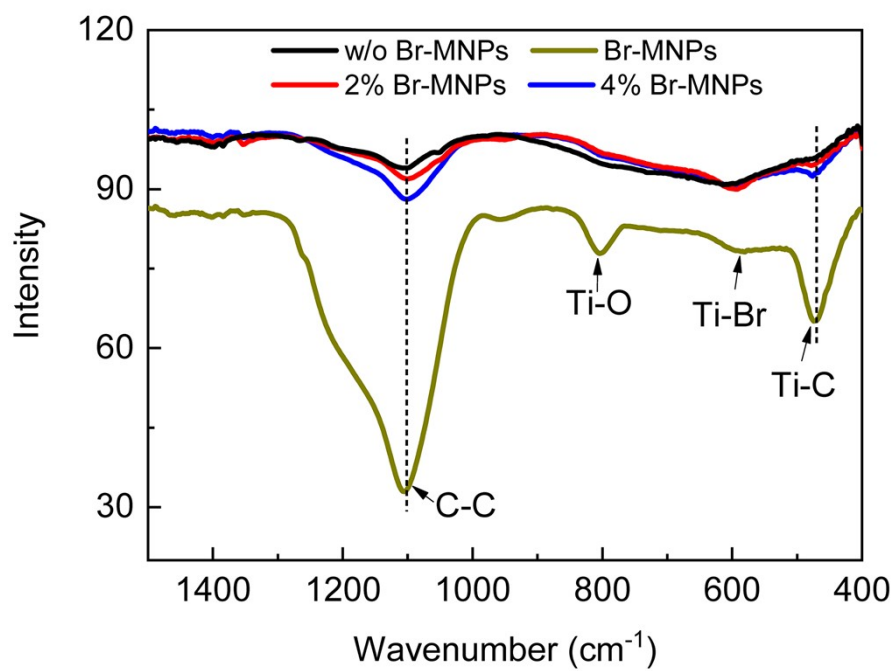

**Figure S9.** FTIR spectra of the Br-MNPs, pristine perovskite and Br-MNPs assisted perovskite films.

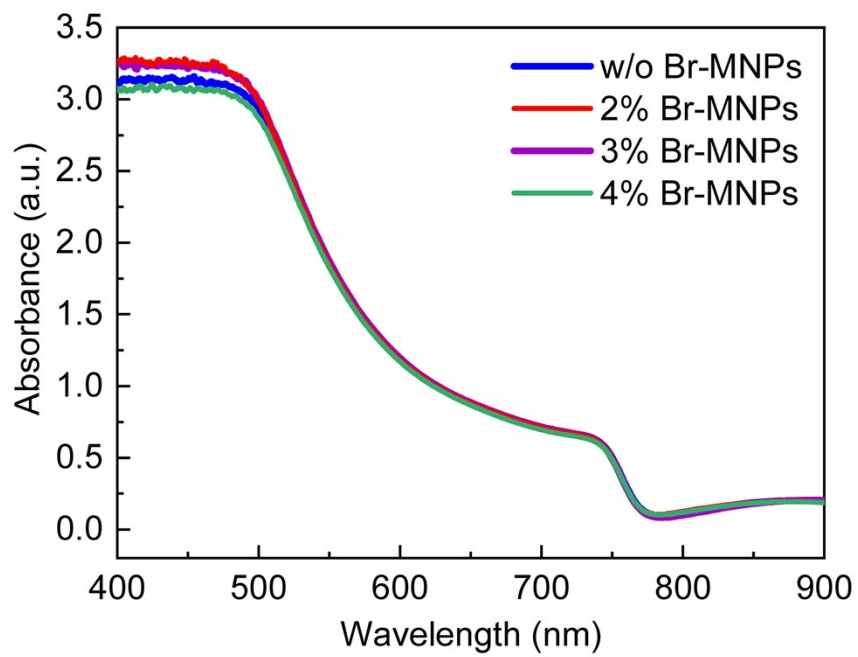

**Figure S10.** Absorption spectra of different Br-MNPs-assisted perovskite films.

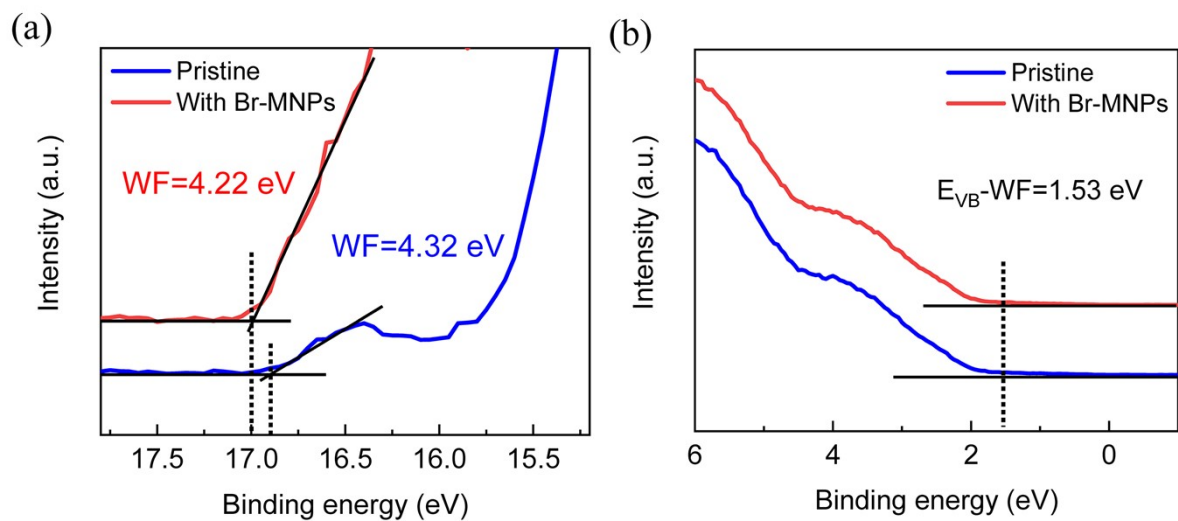

**Figure S11.** (a) Ultraviolet photoelectron spectroscopy (UPS) spectra of pristine and Br-MNPs decorated perovskite films. The work function (WF) is calculated by the equation:  $WF = h\nu - E_{cutoff}$ , where  $E_{cutoff}$  is the secondary electron cut off. (b) The valence band spectra of both samples.

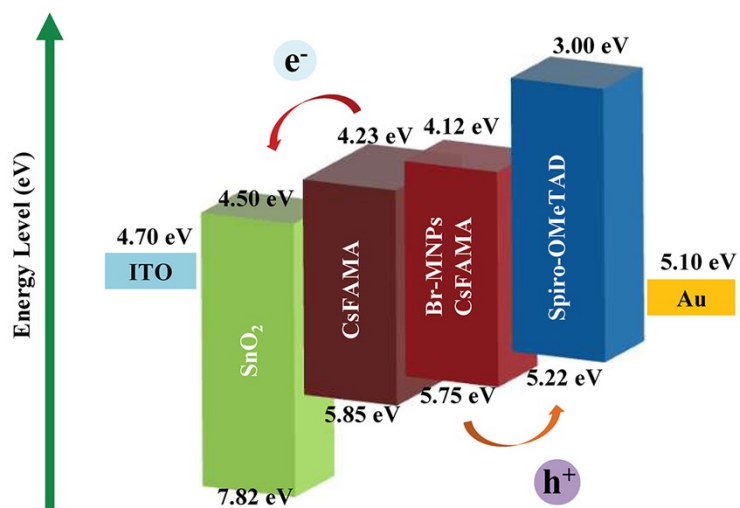

**Figure S12.** The energy band diagram of the as-fabricated devices.

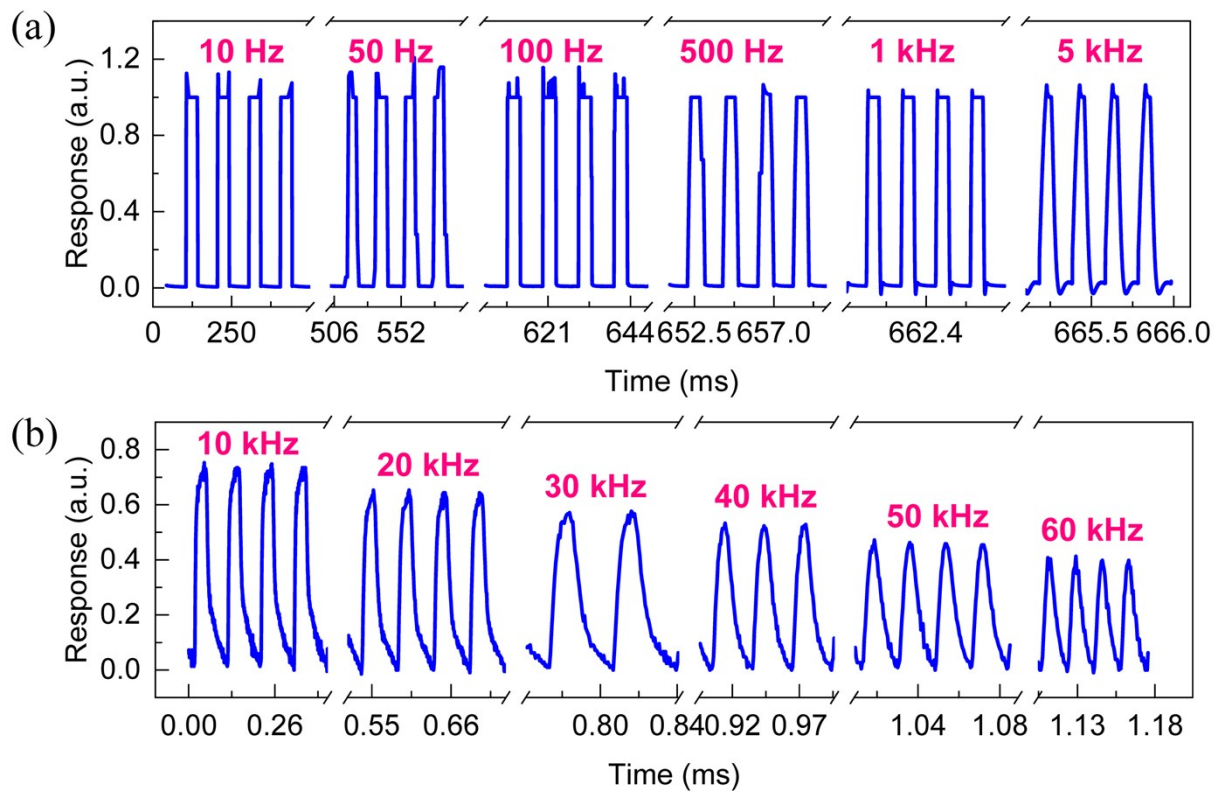

**Figure S13.** Temporal photoresponse of Br-MNPs assisted photodetector under the pulsed light illumination with modulating frequency from (a) 10 Hz to 5 kHz and (b) 10 kHz to 60 kHz.

**Table S1.** Surface roughness extracted from AFM results. SA is the root mean square of surface roughness, SQ represents the average value of surface roughness and Peak-Peak denotes the maxima peak height of surface roughness.

| Sample       | SA (nm) | SQ (nm) | Peak-Peak (nm) |
|--------------|---------|---------|----------------|
| Pristine     | 17.2    | 21.4    | 141            |
| With Br-MNPs | 15.6    | 19.5    | 136            |

**Table S2.** The fitting parameters extracted from PL decay curves using the equation of  $I(t) = A_1 \exp(-t/\tau_1) + A_2 \exp(-t/\tau_2)$ .

| Sample       | $\tau_1$ (ns) | $A_1$ (%) | $\tau_2$ (ns) | $A_2$ (%) | $\tau_{\text{ave}}$ (ns) |
|--------------|---------------|-----------|---------------|-----------|--------------------------|
| Pristine     | 3.45          | 26.97     | 123.43        | 73.03     | 122.20                   |
| With Br-MNPs | 3.25          | 42.53     | 80.95         | 57.47     | 78.71                    |
